# Supplementary material for: Comparison of Deeply Versus Mildly Invasive Mesothelioma Proteomes Identifies Potential Links Between Mitochondrial Acadvl Expression and Biomarkers of Aggressiveness
Source: Preprints.org preprint supplement (doi:10.20944/preprints202305.1698.v1), 2023-05-24
Supplement: Supplementary file 1 [file Supplementary Table S1.docx]

**Supplementary Table S2**: List of tumor tissue proteins both present in the two comparisons [1+2+3] vs 4 and [3 vs 1], with abundance changes satisfying the condition *p* < 0.05.Gene and full protein names are given for *Rattus norvegicus* according to www.uniprot.org.

| **Gene** | **Name** |
| --- | --- |
| *Ywhae* | 14-3-3 protein epsilon |
| *Aldh16a1* | Aldehyde dehydrogenase family 16 member A1 |
| *Aacs* | Acetoacetyl-CoA synthetase |
| *Acadl* | Long-chain specific acyl-CoA dehydrogenase, mitochondrial |
| *Acly* | ATP-citrate synthase |
| *Actn4* | Alpha-actinin-4 |
| *Aip* | AH receptor-interacting protein |
| *Alb* | Serum albumin |
| *Aldoa* | Fructose-bisphosphate aldolase A |
| *Anxa1* | Annexin A1 |
| *Anxa2* | Annexin A2 |
| *Anxa4* | Annexin A4 |
| *Apoe* | Apolipoprotein E |
| *Blvra* | Biliverdin reductase A |
| *Ca3* | Carbonic anhydrase 3 |
| *Calu* | Calumenin |
| *Capg* | Macrophage-capping protein |
| *Ctsc* | Dipeptidyl peptidase 1 |
| *Cpb1* | Carboxypeptidase B |
| *Cpq* | Carboxypeptidase Q |
| *Cd44* | CD44 antigen |
| *-* | Uncharacterized protein C12orf43 homolog |
| *Cnn1* | Calponin-1 |
| *Col1a2* | Collagen alpha-2(I) chain |
| *Mtco2* | Cytochrome c oxidase subunit 2 |
| *Cox5b* | Cytochrome c oxidase subunit 5B, mitochondrial |
| *Cpne9* | Copine-9 |
| *Cspg4* | Chondroitin sulfate proteoglycan 4 |
| *Csrp1* | Cysteine and glycine-rich protein 1 |
| *Dync1i2* | Cytoplasmic dynein 1 intermediate chain 2 |
| *Dctn4* | Dynactin subunit 4 |
| *Des* | Desmin |
| *Dhcr7* | 7-dehydrocholesterol reductase |
| *Sord* | Sorbitol dehydrogenase |
| *Dnajb11* | DnaJ homolog subfamily B member 11 |
| *Dynlrb1* | Dynein light chain roadblock-type 1 |
| *Dpysl2* | Dihydropyrimidinase-related protein 2 |
| *Dpysl3* | Dihydropyrimidinase-related protein 3 |
| *Eef1a1* | Elongation factor 1-alpha 1 |
| *Eef2* | Elongation factor 2 |
| *Efhd2* | EF-hand domain-containing protein D2 |
| *Elavl1* | ELAV-like protein 1 |
| *Epdr1* | Mammalian ependymin-related protein 1 |
| *Etf1* | Eukaryotic peptide chain release factor subunit 1 |
| *Esyt1* | Extended synaptotagmin-1 |
| *Ezr* | Ezrin |
| *Fabp4* | Fatty acid-binding protein, adipocyte |
| *Fasn* | Fatty acid synthase |
| *Ahsg* | Alpha-2-HS-glycoprotein |
| *Fn1* | Fibronectin |
| *Fkbp1a* | Peptidyl-prolyl cis-trans isomerase FKBP1A |
| *Fdps* | Farnesyl pyrophosphate synthase |
| *Ftl1* | Ferritin light chain 1 |
| *Khsrp* | Far upstream element-binding protein 2 |
| *Fut11* | Alpha-(1,3)-fucosyltransferase 11 |
| *Gapdh* | Glyceraldehyde-3-phosphate dehydrogenase |
| *Gpx1* | Glutathione peroxidase 1 |
| *Grb2* | Growth factor receptor-bound protein 2 |
| *Gsr* | Glutathione reductase |
| *Gstm2* | Glutathione S-transferase Mu 2 |
| *Gstp1* | Glutathione S-transferase P |
| *Hist1h1e* | Histone H1.4 |
| *H2afz* | Histone H2A.Z |
| *-* | Histone H2B type 1 |
| *-* | Histone H3.1 |
| *RT1-Bb* | Rano class II histocompatibility antigen, B-1 beta chain |
| *Hba1* | Hemoglobin subunit alpha-1/2 |
| *Hbb* | Hemoglobin subunit beta-1 |
| *Hsd17b10* | 3-hydroxyacyl-CoA dehydrogenase type-2 |
| *Hmgb2* | High mobility group protein B2 |
| *Hnrnph2* | Heterogeneous nuclear ribonucleoprotein H2 |
| *Hnrnpd* | Heterogeneous nuclear ribonucleoprotein D0 |
| *Hnrnpf* | Heterogeneous nuclear ribonucleoprotein F |
| *Hnrnpm* | Heterogeneous nuclear ribonucleoprotein M |
| *Hp1bp3* | Heterochromatin protein 1-binding protein 3 |
| *Hprt1* | Hypoxanthine-guanine phosphoribosyltransferase |
| *Hspb1* | Heat shock protein beta-1 |
| *Eif4h* | Eukaryotic translation initiation factor 4H |
| *Eif5a* | Eukaryotic translation initiation factor 5A-1 |
| *Eif6* | Eukaryotic translation initiation factor 6 |
| *Ilk* | Integrin-linked protein kinase |
| *Impdh2* | Inosine-5'-monophosphate dehydrogenase 2 |
| *Ak2* | Adenylate kinase 2, mitochondria |
| *Pkm* | Pyruvate kinase PKM |
| *Ldha* | L-lactate dehydrogenase A chain |
| *Lgals3* | Galectin-3 |
| *Lmna* | Prelamin-A/C |
| *Lmnb1* | Lamin-B1 |
| *Mybbp1a* | Myb-binding protein 1A |
| *Mcts1* | Malignant T-cell-amplified sequence 1 |
| *Mdh1* | Malate dehydrogenase, cytoplasmic |
| *Mat2a* | S-adenosylmethionine synthase isoform type-2 |
| *Mug1* | Murinoglobulin-1 |
| *Cmas* | N-acylneuraminate cytidylyltransferase |
| *Fam129b* | Niban-like protein 1 |
| *Nsf* | Vesicle-fusing ATPase |
| *Nucb2* | Nucleobindin-2 |
| *Oat* | Ornithine aminotransferase, mitochondrial |
| *P4ha1* | Prolyl 4-hydroxylase subunit alpha-1 |
| *Parp1* | Poly [ADP-ribose] polymerase 1 |
| *Pgam1* | Phosphoglycerate mutase 1 |
| *Pgk1* | Phosphoglycerate kinase 1 |
| *Plec* | Plectin |
| *Plod1* | Procollagen-lysine,2-oxoglutarate 5-dioxygenase 1 |
| *Plp2* | Proteolipid protein 2 |
| *Plgrkt* | Plasminogen receptor (KT) |
| *Pnp* | Purine nucleoside phosphorylase |
| *Ppp1ca* | Serine/threonine-protein phosphatase PP1-alpha catalytic subunit |
| *Prkcdbp* | Protein kinase C delta-binding protein |
| *Prdx2* | Peroxiredoxin-2 |
| *Prdx6* | Peroxiredoxin-6 |
| *Psma7* | Proteasome subunit alpha type-7 |
| *Psmb10* | Proteasome subunit beta type-10 |
| *Psmd2* | 26S proteasome non-ATPase regulatory subunit 2 |
| *Ptgis* | Prostacyclin synthase |
| *Pygb* | Glycogen phosphorylase, brain form |
| *Rab31* | Ras-related protein Rab-31 |
| *Rab5a* | Ras-related protein Rab-5A |
| *Rac1* | Ras-related C3 botulinum toxin substrate 1 |
| *Ran* | GTP-binding nuclear protein Ran |
| *Rpl12* | 60S ribosomal protein L12 |
| *Rpl14* | 60S ribosomal protein L14 |
| *Rpl21* | 60S ribosomal protein L21 |
| *Rpl22* | 60S ribosomal protein L22 |
| *Rpl27a* | 60S ribosomal protein L27a |
| *Rpn2* | Dolichyl-diphosphooligosaccharide--protein glycosyltransferase subunit 2 |
| *Rps18* | 40S ribosomal protein S18 |
| *Rps20* | 40S ribosomal protein S20 |
| *Rps23* | 40S ribosomal protein S23 |
| *Rps3* | 40S ribosomal protein S3 |
| *Rps5* | 40S ribosomal protein S5 |
| *Rps6* | 40S ribosomal protein S6 |
| *Rps7* | 40S ribosomal protein S7 |
| *Rps8* | 40S ribosomal protein S8 |
| *Rps9* | 40S ribosomal protein S9 |
| *S100a4* | Protein S100-A4 |
| *Sar1b* | GTP-binding protein SAR1b |
| *Scrn1* | Secernin-1 |
| *Phgdh* | D-3-phosphoglycerate dehydrogenase |
| *Serpinh1* | Serpinh1 |
| *Sfxn3* | Sideroflexin-3 |
| *Srsf2* | Serine/arginine-rich splicing factor 2 |
| *Sars* | Serine--tRNA ligase, cytoplasmic |
| *Sncg* | Gamma-synuclein |
| *Tagln2* | Transgelin-2 |
| *Tbca* | Tubulin-specific chaperone A |
| *Vcp* | Transitional endoplasmic reticulum ATPase |
| *Tmed10* | Transmembrane emp24 domain-containing protein 10 |
| *Tmem33* | Transmembrane protein 33 |
| *Top2A* | DNA topoisomerase 2-alpha |
| *Tpi1* | Triosephosphate isomerase |
| *Tpr* | Nucleoprotein TPR |
| *Txndc12* | Thioredoxin domain-containing protein 12 |
| *Ugdh* | UDP-glucose 6-dehydrogenase |
| *Uggt1* | UDP-glucose:glycoprotein glucosyltransferase 1 |
| *Vat1* | Synaptic vesicle membrane protein VAT-1 homolog |
| *Atp6v1b2* | V-type proton ATPase subunit B, brain isoform |
| *Vps26a* | Vacuolar protein sorting-associated protein 26A |
| *Gc* | Vitamin D-binding protein |
| *Vwa5a* | von Willebrand factor A domain-containing protein 5A |
| *Wdr81* | WD repeat-containing protein 81 |
| *Zc3hav1* | Zinc finger CCCH-type antiviral protein 1 |
