# Supplementary material for: Comparison of Deeply Versus Mildly Invasive Mesothelioma Proteomes Identifies Potential Links Between Mitochondrial Acadvl Expression and Biomarkers of Aggressiveness
Source: Preprints.org preprint supplement (doi:10.20944/preprints202305.1698.v1), 2023-05-24
Supplement: Supplementary file 2 [file Supplementary Table S2.docx]

**Supplementary Table S2**: List of tumor tissue proteins exhibiting tendencies towards an increase / decrease with maximum aggressiveness only in the comparison [1+2+3] vs 4 (*p* < 0.05 for the comparison 3 vs 1).Comparison M5-T1 vs F4-T2 (0.05 < *p*-values < 0.085). Gene and full protein names are given for *Rattus norvegicus* according to www.uniprot.org.

| **Gene** | **Name** | ***p*-values**  [1+2+3] vs 4 | ***p*-values**  (3 vs 1) |
| --- | --- | --- | --- |
| *Arpc5* | Actin-related protein 2/3 complex subunit 5 | 0.06413 | 6.78 x 10-5 |
| *Calr* | Calreticulin | 0.08709 | 0.00254 |
| *Cdc42* | Cell division control protein 42 homolog | 0.08531 | 0.00474 |
| *Cp* | Ceruloplasmin | 0.06753 | 0.00026 |
| *Fscn1* | Fascin | 0.06828 | 0.00034 |
| *RT1-Db1* | Rano class II histocompatibility antigen, D-1 beta chain | 0.07876 | 9.78 x 10-5 |
| *Hmga1* | High mobility group protein HMG-I/HMG-Y | 0.06169 | 2.79 x 10-5 |
| *Pkn1* | Serine/threonine-protein kinase N1 | 0.06336 | 0.02323 |
| *Rpl23* | 60S ribosomal protein L23 | 0.06218 | 0.04386 |
| *Snx5* | Sorting nexin-5 | 0.07289 | 0.01297 |
| *Steap3* | Metalloreductase STEAP3 | 0.0649 | 0.03313 |
| *Tap1* | Antigen peptide transporter 1 | 0.07957 | 0.00633 |
| *Trappc3* | Trafficking protein particle complex subunit 3 | 0.0643 | 0.04091 |
| *Uqcrfs1* | Cytochrome b-c1 complex subunit Rieske, mitochondrial | 0.0785 | 0.00573 |
| *Wdr1* | WD repeat-containing protein 1 | 0.074 | 0.01561 |
| *Wt1* | Wilms tumor protein homolog | 0.07686 | 0.00062 |
